# Supplementary material for: In Situ Self-Assembling Liver Spheroids with Synthetic Nanoscaffolds for Preclinical Drug Screening Applications
Source: PubMed Central journal article supplement (PMC11129140; doi:10.1021/acsami.3c17384), 2024-05-14
Supplement: am3c17384_si_001.pdf [file am3c17384_si_001.pdf]

## Supporting Information

# *In-Situ* Self-Assembling Liver Spheroids with Synthetic Nanoscaffolds for Preclinical Drug Screening Applications

*Lina Wu,<sup>1</sup> Driton Vllasaliu<sup>1</sup>, Qi Cui<sup>1</sup> and Bahijja Tolulope Raimi-Abraham<sup>1\*</sup>*

\* **Corresponding Author:** Dr Bahijja Raimi-Abraham, [Bahijja.Raimi-](mailto:Bahijja.Raimi-Abraham@kcl.ac.uk)

[Abraham@kcl.ac.uk](mailto:Abraham@kcl.ac.uk)

King's College London, Faculty of Life Sciences and Medicine, School of Cancer and Pharmaceutical Sciences, Institute of Pharmaceutical Science, Franklin-Wilkins Building, 150 Stamford Street, London SE1 9NH, United Kingdom

**Influence of PCL nanofibre on HepG2 cell viability and proliferation**

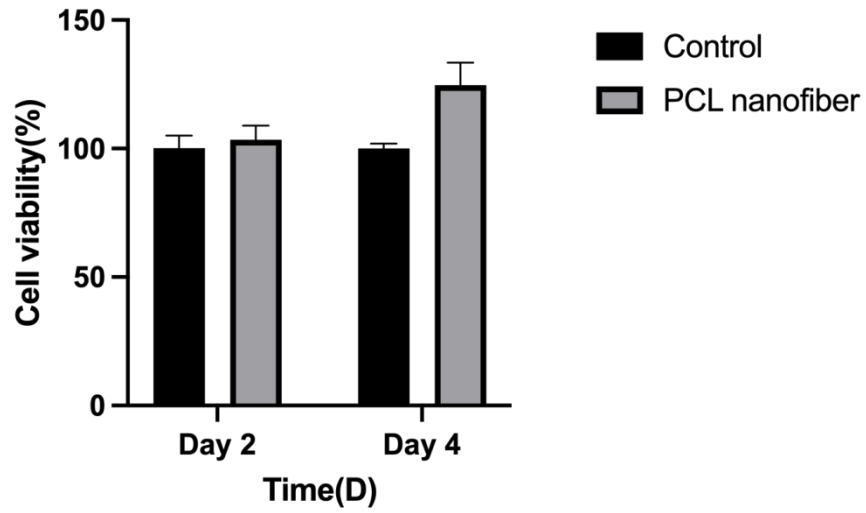

*Figure S1. Toxicity of PCL nanofibre on 2D HepG2 cells.*

### **Influence of Nanoscaffold Concentration on Spheroid Formation**

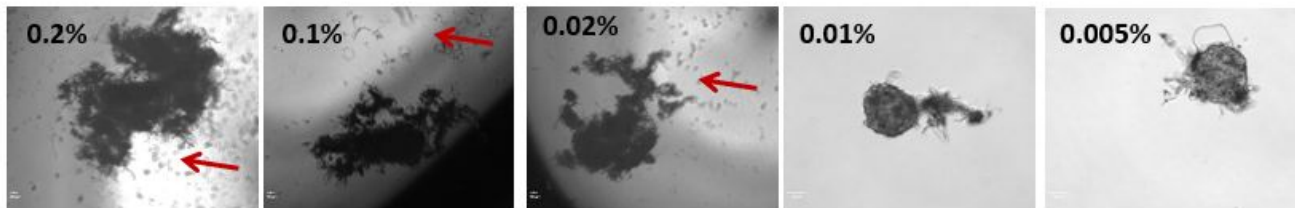

*Figure S2. HepG2 Spheroids with different concentrations of PCL nanofibres on Day 3.*

*Scale bar: 50  $\mu$ m. Objective: 10X.*

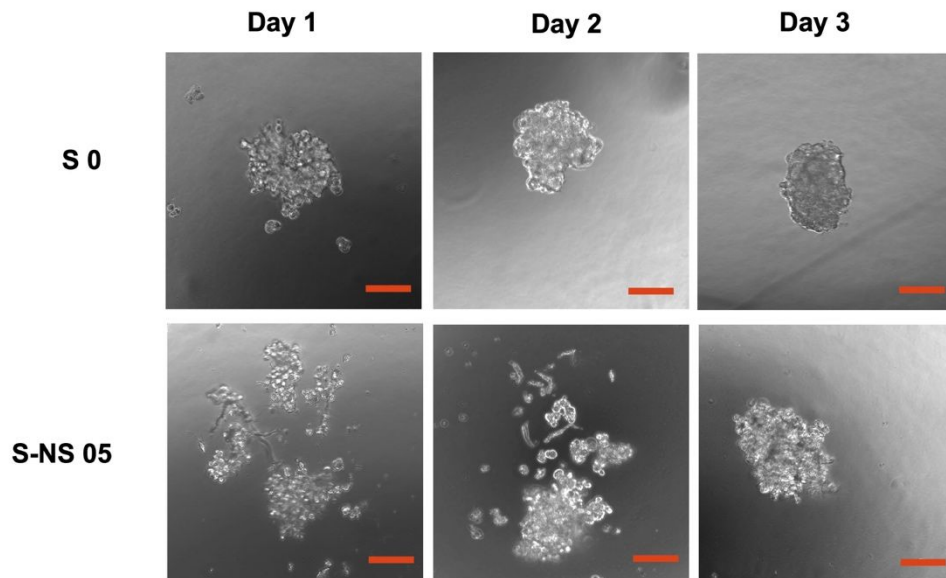

*Figure S3. Generation of HepG2 Spheroids with and without nanoscaffolds. Scale bar: 100  $\mu\text{m}$ .*
